1 **Post-Transcriptional Bone Morphogenetic Protein 2 (BMP2) Gene Regulation in Aorta**

2 Tapan A. Shah<sup>1</sup>, Ying Tang<sup>1</sup>, Edward J. Yurkow<sup>2</sup> and Melissa B. Rogers<sup>1\*</sup>

3 <sup>1</sup>Rutgers - New Jersey Medical School, Microbiology, Biochemistry, & Molecular Genetics,

4 Newark, NJ

5 <sup>2</sup>Rutgers University Molecular Imaging Center (RUMIC), Rutgers University, Piscataway, NJ

6 Running title: Bmp2 Gene Regulation in the Aorta

7 \* To whom should correspondence and reprint request be addressed to: Melissa B. Rogers,

8 Ph.D., Microbiology, Biochemistry & Molecular Genetics, Rutgers - NJ Medical School, Bldg. UH

9 Cancer Center, Room F1216, 205 South Orange Ave., Newark, NJ 07103. Email:

10 [rogersmb@njms.rutgers.edu](mailto:rogersmb@njms.rutgers.edu), telephone: 973 972 2984

11 **Keywords:** BMP, Klotho, gene regulation, signaling, cardiovascular, calcification,

12 atherosclerosis, renal physiology, sex differences

13 **Grant Support:** Funding was provided by the National Heart, Lung, and Blood Institute

14 R01HL114751 and National Institutes of Aging R56AG050762 to MBR

15 **Conflict of Interests Disclosure:** The authors declare that they have no conflicts of interest

16 with the contents of this article.

17 **Abstract**

18 Deletion of an “ultra-conserved sequence” (UCS) within the *Bone Morphogenetic Protein*

19 (*Bmp2*) mRNA previously revealed that the sequence represses *Bmp2* reporter gene

20 expression in vascular cells. The objective was to determine the impact of the endogenous

21 UCS on *Bmp2* mRNA levels, BMP signaling, and calcification in the healthy control aorta and in

22 the calcified aorta of mice with renal disease. We compared the phenotypes of mice bearing a

23 wild type *Bmp2* allele or the UCS deletion allele in mice with normal kidney function or in *Klotho*

24 mutant mice with reduced kidney function. BMP signaling and calcium levels were normally

25 higher in control females relative to males. UCS deletion induced aortic *Bmp2* mRNA and BMP

26 signaling in control males, but not in females. UCS deletion significantly increased BMP

27 signaling in both male and female *Klotho* homozygotes. Inheritance of the *Bmp2* UCS deletion  
28 and *Klotho* alleles was skewed from Mendelian expectations suggesting that these alleles  
29 influence interacting pathways. Analyses of body and heart weight supported these interactions.  
30 The *Bmp2* UCS represses BMP signaling in control males and in mice of both sexes with  
31 abnormal mineralization associated with kidney disease. Disease and sex-specific differences  
32 in *Bmp2* gene control may influence the onset and progression of cardiovascular diseases.

### 33 **Introduction**

34 The pro-osteogenic bone morphogenetic protein 2 (BMP2) is a potent pro-calcific signal (3-10).  
35 Moreover, BMP2 and its downstream effectors, e.g., phosphorylated SMAD1/5/9(8), are  
36 implicated strongly in pathological calcification (5,6,9-13). Various parallels exist between  
37 osteogenesis and cardiovascular calcification *via* the BMP2 link. BMP2 can induce osteogenic  
38 factors in human aortic valve interstitial cells (13) and aortic smooth muscle cells (14). BMP2  
39 induces ossification in diseased aortic valves (9,11,15) and in atherosclerotic plaques (6) and  
40 induces calcification *in vitro* (10,13,16-18). Despite an explicit role of BMP2 in cardiovascular  
41 calcification, the mechanisms regulating the patterns of BMP2 and its downstream effectors in  
42 the healthy and diseased aorta are incompletely understood. Significant and unanswered  
43 questions are: What restrains *Bmp2* expression in healthy cardiovascular tissues? Why is  
44 *Bmp2* induced in physiologies such as aging and reduced renal function that promote  
45 pathological calcification? Elucidating the mechanisms that control BMP2 synthesis leading to  
46 pathological calcification may reveal new therapeutic strategies.

47 Several *cis* and *trans*-acting factors can regulate *Bmp2* gene expression either transcriptionally  
48 or post-transcriptionally [reviewed in (19) and (20)]. The *Bmp2* gene may be “active”; *i.e.*,  
49 transcribed, but a post-transcriptional block may prevent BMP2 synthesis in specific cell types.  
50 Our studies showed that a unique ultra-conserved sequence (UCS) in the 3' untranslated region  
51 (UTR) of the transcript mediates this repression (21-23). The UCS repressed reporter genes in  
52 mesenchymal and other types of non-transformed cells *in vitro* (24-27) as well as in the

## Bmp2 Gene Regulation in the Aorta

53 coronary vasculature, valves, and the aorta *in vivo* (25,27). The fact that these tissues are  
54 prone to calcification in patients with CAVD and atherosclerosis risk factors, suggests the  
55 hypothesis that UCS-mediated repression may protect against pathological levels of BMP2  
56 synthesis leading to calcification.

57 Our previous findings in embryos demonstrated that the UCS limits *Bmp2* mRNA abundance  
58 and BMP signaling and that disturbing *Bmp2* 3'UTR-mediated events negatively impacted  
59 embryonic development. Here we describe the impact of an allele lacking the UCS (*Bmp2*<sup>ΔUCS</sup>)  
60 on *Bmp2* expression and BMP signaling in the adult aorta of healthy control mice and in mice  
61 with a mutation that causes renal failure and premature aging.

62 BMP2 levels are normally low in the healthy vasculature but are induced in pathologically  
63 calcified tissues. Mutation of the *Klotho* gene provides an experimental model in which we could  
64 compare the mechanisms that repress or activate *Bmp2*. KLOTHO is a protein largely  
65 synthesized in the kidney that controls mineral metabolism. KLOTHO deficiency promotes  
66 hyperphosphatemia that leads to rapid and dramatic calcification of the aorta and aortic valve by  
67 6-7 weeks of age (28,29). In contrast, calcification in other models, e.g., hyperlipidemia, is quite  
68 slow (30). Furthermore, BMP2 protein was observed in the calcified aortic valves of *Klotho* null  
69 mice and BMP signaling was shown to be required for aortic valve calcification (29). In this  
70 study, we describe how the UCS affects *Bmp2* RNA abundance, BMP signaling, and vascular  
71 calcification in the aorta and the effect on the overall fitness of control mice and *Klotho* mutant  
72 mice of both sexes.

### 73 **Materials and Methods**

#### 74 **Mouse strains**

75 The background of all mice bearing the *Bmp2* and *Klotho* mutations was a mixture of strains  
76 129, C57Bl/6J, and C3H/J. The UCS deletion allele (*Bmp2*<sup>ΔUCS</sup>) was described in Shah *et al.*  
77 (31). Mice bearing the *Klotho* mutation (28) were a gracious gift from Dr. Makoto Kuro-o (Jichi  
78 Medical University) by way of Dr. Sylvia Christakos (Rutgers New Jersey Medical School).

79 C57Bl/6 female mice (47 days, 6 months, 12 months, 18 months and 22 or 23 months old) and  
80 male mice (47 days, 6 months, 12 months, 18 months and 21 months old) were obtained from  
81 the National Institute of Aging (NIA) aged rodent colonies (Bethesda, MD).

## 82 **Mice Handling**

83 Animals were handled in accordance with the Guidelines for Care and Use of Experimental  
84 Animals and approved by the NJ Medical School Institutional Animal Care and Use Committee  
85 (IACUC protocol #15069). Control and *Klotho* homozygote mice were fed regular chow and  
86 euthanized at  $47 \pm 6$  days of age. After weaning, *Klotho* homozygotes received softened chow  
87 on the floor of the cage. Aortas were obtained from 10-week-old C57Bl/6 females that were  
88 ovariectomized for another study (Khariv and Elkabes in preparation, IACUC protocol #15038).  
89 Briefly, mice were anesthetized and both ovaries surgically removed. Sham mice underwent  
90 surgery without removal of ovaries. Three weeks post-surgery, mice were euthanized and  
91 necropsied as described below.

92 On the day of necropsy, mice were killed with an inhalation overdose of isoflurane. Immediately  
93 thereafter, the heart was perfused *via* the left ventricle with phosphate buffered saline (PBS, pH  
94 7.3), to remove excess blood. The heart and aorta down to the aortic abdominal bifurcation into  
95 the left and right common iliac arteries were removed intact. After cutting the aorta at the  
96 surface of the heart, both tissues were rinsed in PBS, blot dried, and weighed. The heart was  
97 fixed in neutral buffered formalin. The aorta was snap-frozen in liquid nitrogen and stored at -  
98 80°C. For biochemical assays, frozen tissues were ground in liquid nitrogen using a mortar and  
99 pestle. The frozen powder was split to be used for different assays. To facilitate the handling of  
100 small tissues such as the diseased *Klotho* aortas, glass beads (Millipore-SIGMA, St. Louis, MO,  
101 # G1277) were added during the grinding. Glass beads did not affect the biochemical assays  
102 (Fig. 1A, B).

## 103 **Genotyping**

## Bmp2 Gene Regulation in the Aorta

104 Genomic DNA was isolated and *Bmp2* genotypes were determined by semi-quantitative PCR as  
105 described in Shah *et al* (31). *Klotho* genotypes were determined by semi-quantitative PCR  
106 using LA-Tag DNA polymerase and TaKaRa buffer with Mg<sup>+2</sup> (TaKaRa Shuzo, Tokyo, Japan)  
107 as follows: initial denaturation at 97°C for 2 min; followed by 32 cycles of denaturation at 94°C  
108 for 30 secs; annealing at 55°C for 30 secs; and extension at 72°C for 1 min 30 secs; ending with  
109 a final extension at 72°C for 10 min. A common primer (TGGAGATTGGAAGTGGACG, 0.2 μM  
110 final concentration) and a wild type specific primer (TTAAGGACTCCTGCATCTGC, 0.05 μM  
111 final concentration) amplified a 458 bp fragment from the wild type *Klotho* allele. The common  
112 primer and a mutation specific primer (CAAGGACCAGTTCATCATCG, 0.2 μM final  
113 concentration) amplified a 920 bp fragment from the *Klotho* mutant allele (32). Some *Bmp2* and  
114 *Klotho* genotyping was performed by Transnetyx, Inc, Cordova, TN.

### 115 **RNA Isolation and Reverse Transcription and Quantitative Real Time PCR (RT qPCR)**

116 Total RNA was isolated using the miRNeasy kit (Qiagen Inc., Germantown, MD, # 217004).  
117 RNA quantity and quality (A260/280) were determined using a NanoDrop spectrophotometer  
118 (NanoDrop Technologies, Wilmington, DE). cDNA was synthesized using the QuantiTect®  
119 Reverse Transcription kit (Qiagen Inc., Germantown, MD, # 205313). Quantitative PCR was  
120 performed using the QuantiTect® SYBR® Green PCR kit (Qiagen Inc., Germantown, MD,  
121 #204145) and a CFX96 Touch™ Real-Time PCR Detection System (Bio-Rad Laboratories,  
122 Hercules, CA, #1855196). Relative *Bmp2* mRNA expression was calculated using CFX96  
123 Manager software (Bio-Rad Laboratories, Hercules, CA, # 1845000) with actin as the reference  
124 gene. Intron-spanning primers were used to eliminate amplicons generated from any  
125 contaminating genomic DNA. The primer sequences used were *Bmp2* - Forward  
126 (TAGATCTGTACCGCAGGCA) and Reverse (GTTCTCCACGGCTTCTTC) and *Actin* -  
127 Forward (CGCCACCAGTTCGCCATGGA) and reverse (TACAGCCCGGGGAGCATCGT).

### 128 **Western blots**

## Bmp2 Gene Regulation in the Aorta

129 Frozen ground tissue was solubilized in RIPA buffer, sonicated, and subjected to western blot  
130 analyses as described in Shah et al (31). BMP signaling was measured using a monoclonal  
131 phospho-SMAD 1/5/9(8) antibody (Cell Signaling Technology, Danvers, MA, #13820) at a  
132 dilution of 1:1000. The pSMAD antibody was authenticated as described in (31) and Fig. 1C, D.  
133 Polyclonal total SMAD 1/5/9(8) (Santa Cruz Biotechnology, Inc., Santa Cruz, CA, #sc-6031-R)  
134 and a polyclonal actin antibody (Santa Cruz Biotechnology, Inc., Santa Cruz, CA, #sc-1615-R)  
135 were subsequently used at a dilution of 1:1000. In all cases, the secondary antibody was Goat  
136 Anti-Rabbit HRP (Abcam, Cambridge, MA, # ab97080) at a dilution of 1: 20,000. Antibody-  
137 bound proteins were detected using SuperSignal™ West Femto Maximum Sensitivity Substrate  
138 (ThermoFisher Scientific, Waltham, MA, # 34096) and imaged using a FluoroChem M (Protein  
139 Simple, San Jose, California).

### 140 **Calcium assays**

141 Ground tissue was solubilized and lysed by sonication on ice in PBS, pH 7.3 containing 0.16  
142 mg/mL heparin. The Cayman Chemical Calcium Assay kit was used to measure calcium levels  
143 (Ann-Arbor, MI, #701220). Calcium levels were normalized to protein levels measured using  
144 the Bradford assay (Bio-Rad Laboratories, Hercules, CA, # 5000006).

### 145 **Spatial mapping of calcified structures**

146 The patterns of mineralization in *Klotho* heterozygote vs. *Klotho* mutant mice were determined  
147 using microcomputerized tomography (microCT) at the Rutgers Molecular Imaging Center  
148 (<http://imaging.rutgers.edu/>). Mice were scanned using the Albira® PET/CT (Carestream,  
149 Rochester, NY) at standard voltage and current settings (45kV and 400µA) with a minimal voxel  
150 size of <35 µm. Voxel intensities in the reconstructed images were evaluated and segmented  
151 with VivoQuant image analysis software (version 1.23, inviCRO LLC, Boston).

### 152 **Statistical Analysis**

153 The statistical significance was determined using student's *t* test, Chi-square test, linear  
154 regression and two-way ANOVA analysis. A *p* value of less 0.05 was considered statistically  
155 significant.

## 156 **Results**

### 157 **Adult mice lacking the *Bmp2* UCS**

158 We previously demonstrated that the *Bmp2* UCS represses reporter gene expression *in vitro* in  
159 mesenchymal cells (20,24,25) and *in vivo* in the aorta and coronary vasculature (25). These  
160 tissues are prone to pathological calcification. Furthermore, we showed that the *Bmp2* UCS  
161 represses *Bmp2* RNA abundance and BMP signaling in mid-gestation embryos (31). Based on  
162 these findings, we hypothesized that the *Bmp2* UCS represses *Bmp2* RNA levels, BMP  
163 signaling and calcium levels in the aorta. Although mice completely lacking the UCS were  
164 underrepresented (31), some mice did survive to adulthood. Consequently, we tested the  
165 impact of the UCS in the aorta of these adults. In all cases, both sexes were assayed, because  
166 sex hormones can influence the expression of various members of the BMP signaling pathway  
167 (33). We also tested UCS function in pathologically calcified aorta from mice with renal failure  
168 and premature aging due to KLOTTHO deficiency (28). To obtain aorta from control or diseased  
169 mice with three *Bmp2* genotypes (wild type *Bmp2*<sup>+/+</sup>, heterozygous *Bmp2*<sup>+/ $\Delta$ UCS</sup>, or homozygous  
170 *Bmp2* <sup>$\Delta$ UCS/ $\Delta$ UCS</sup> for the UCS deletion), we mated parents that were heterozygous for the *Bmp2*  
171 allele lacking the UCS (*Bmp2*<sup>+/ $\Delta$ UCS</sup>) and for the *Klotho* mutant allele (*Kl*<sup>kl/+</sup>). The expected and  
172 actual fractions of each genotype are shown in Fig. 2A. In mice with adequate KLOTTHO levels  
173 (*Kl*<sup>+/+</sup> or *Kl*<sup>kl/+</sup>), no statistically significant skewing from the Mendelian inheritance of the *Bmp2*  
174 mutant allele was observed (Fig. 2B).

175 The *Klotho* mutant allele is recessive. The first visible phenotype of homozygous *Klotho* mutant  
176 mice (*Kl*<sup>kl/kl</sup>) is runting relative to control littermates at the time of weaning. Although significant  
177 prenatal or perinatal lethality has not been reported, we observed underrepresentation of *Klotho*  
178 homozygotes, although the difference from Mendelian expectations was not quite significant

179 (Fig. 2C). However, segregation of the *Bmp2* genotypes was significantly skewed in the *Klotho*  
180 homozygotes (Fig. 2D) with a significant overrepresentation of heterozygotes (*Bmp2*<sup>+ΔUCS</sup>)  
181 bearing one wild type and one UCS deletion allele (*Bmp2*<sup>+ΔUCS</sup>, Chi-squared equals 7.15 with 2  
182 degrees of freedom, two-tailed *p*-value < 0.03). These results suggest that changes in BMP2  
183 levels associated with this regulatory mutation alter the fitness of the mice with KLOTHO  
184 deficiency. Indeed, as will be discussed below, *Bmp2* genotype was associated with significant  
185 differences in weight specifically in the diseased *Klotho* homozygotes.

186 To confirm that the *Klotho* mutant allele is fully recessive, we compared wild type (*Kl*<sup>+/+</sup>) mice  
187 and heterozygotes that inherited one wild type and one mutated *Klotho* allele (*Kl*<sup>kl/+</sup>). We found  
188 that the following parameters: *Bmp2* RNA levels, BMP signaling, calcium levels, and organ and  
189 body weights did not differ between *Klotho* heterozygotes and mice with two wild type *Klotho*  
190 alleles (Table 1). Therefore, the results from *Klotho* “control” mice presented below include data  
191 from both wild type and *Klotho* heterozygotes. The influence of *Bmp2* genotype will be  
192 discussed first in control mice and then in the diseased homozygotes.

### 193 **The *Bmp2* UCS influences *Bmp2* RNA and BMP signaling levels in control aorta**

194 We first tested the effect of UCS deletion in aorta from healthy control mice. Using RT qPCR,  
195 we measured relative *Bmp2* RNA levels in aorta from mice that were wild type, heterozygous, or  
196 homozygous for the *Bmp2* UCS deletion allele. Fig. 3A shows that aortic *Bmp2* RNA abundance  
197 increased with the number of UCS deletion alleles in males. Specifically, aortic *Bmp2* RNA  
198 abundance was 1.3-fold higher in heterozygotes (*Bmp2*<sup>+ΔUCS</sup>) and 2-fold higher in homozygotes  
199 (*Bmp2*<sup>ΔUCS/ΔUCS</sup>, *p* = 2.6 x 10<sup>-5</sup>) relative to wild type mice (*Bmp2*<sup>+/+</sup>). Interestingly, although the  
200 UCS acted as a repressor in males, UCS deletion did not affect *Bmp2* RNA abundance in  
201 females (Fig. 3A).

202 We then measured the impact of UCS deletion on BMP signaling as assessed by the  
203 phosphorylation of SMAD1/5/9(8), the canonical BMP signaling intermediates, using an  
204 antibody authenticated as described previously ((31), Fig. 1C, D). The ratio of phosphorylated



## Bmp2 Gene Regulation in the Aorta

205 protein pSMAD1/5/9(8) relative to total SMAD1/5/9(8) levels was 1.7-fold higher in aorta from  
206 male heterozygotes (*Bmp2*<sup>+ΔUCS</sup>,  $p = 0.008$ ) and 2.2-fold higher in male homozygotes  
207 (*Bmp2*<sup>ΔUCS/ΔUCS</sup>,  $p = 3.5 \times 10^{-4}$ ) relative to wild type male mice (Fig. 3B, C). These results are  
208 consistent with the hypothesis that the *Bmp2* UCS represses BMP2 synthesis in the aorta. In  
209 contrast to males, deleting the *Bmp2* UCS failed to induce either *Bmp2* RNA or BMP signaling  
210 in females (Fig. 3A - C). This result and those described below suggest that sex influences  
211 *Bmp2* gene expression.

212 Estrogen was previously shown to directly induce *Bmp2* transcription in cultured bone marrow  
213 mesenchymal stem cells (34). However, the impact of estrogen on *Bmp2* expression has not  
214 been tested *in vivo*. To test whether or not this sex steroid impacts *Bmp2* RNA levels in the  
215 aorta, we measured *Bmp2* mRNA levels in aged females who do not undergo the pre-ovulatory  
216 rise in circulating estrogen levels (35,36). A simple linear regression calculation determined that  
217 aortic *Bmp2* RNA levels declined with increasing age (Fig. 3F,  $R^2 = 0.35$ ,  $p = 0.003$ ). We also  
218 observed reduced *Bmp2* RNA levels in aorta from ovariectomized (OVX) mice relative to mice  
219 subjected to a sham operation (Fig. 3F,  $p = 0.05$ ). Interestingly, in males, *Bmp2* mRNA  
220 abundance was significantly higher in aorta from 21 months old mice relative to younger male  
221 mice (Fig. 3E,  $p = 8.5 \times 10^{-5}$ ) or similarly aged females ( $p = 0.02$ ). These observations are  
222 consistent with both transcriptional and post-transcriptional differences in the mechanisms that  
223 regulate BMP2 synthesis in males and females.

224 We then measured calcium levels normalized to protein concentration in whole aorta lysate from  
225 control males and females. We observed that UCS deletion did not elevate calcium levels in  
226 aorta from either sex (Fig. 3G). This suggests that regulatory mechanisms in the osteogenic  
227 pathway between BMP and calcium deposition may counter the pro-calcific effect of increased  
228 BMP signaling. Intriguingly, BMP signaling (Fig. 3B,  $p = 0.04$ ) and calcium levels (Fig. 3G,  $p =$   
229 0.0004) in control aorta from females were higher than that in control aorta from males. In  
230 summary, sex-dependent differences in the regulatory mechanisms that control aortic

231 calcification include increased BMP signaling and basal calcification levels in females. These  
232 increases are accompanied by an apparent lack of UCS-associated repression in females.

### 233 ***Klotho* mutant mice: an inducible model of *Bmp2* gene expression**

234 Increased BMP2 mRNA levels and BMP signaling are required for calcification in the aortic  
235 valve of mice homozygous for the *Klotho* null allele (29). We tested the role of BMP2 and BMP  
236 signaling in the calcified aorta of mice homozygous for the original hypomorphic *Klotho* allele  
237 (28). First, we confirmed that *Klotho* mRNA levels in the kidneys of mice homozygous for the  
238 *Klotho* mutation were less than 1% of that observed in healthy control mice (Fig. 4A,  $p =$   
239 0.0009). *Bmp2* genotype did not significantly alter *Klotho* RNA abundance (Fig. 4A). BMP  
240 signaling and calcium levels in aorta from control mice that were either wild type ( $Kl^{+/+}$ ) or  
241 heterozygous ( $Kl^{kl/+}$ ) for the *Klotho* mutation were compared to the calcified aorta from *Klotho*  
242 mutant homozygotes ( $Kl^{kl/kl}$ ). BMP signaling was induced nearly 2-fold in aorta from male and  
243 female *Klotho* homozygous mice relative to control mice (Fig. 4B, C;  $p = 0.03$ ). Calcium levels  
244 in the aorta from *Klotho* mutant homozygotes were significantly elevated by over 2-fold in males  
245 ( $p = 1.4 \times 10^{-6}$ ) and females ( $p = 5.0 \times 10^{-4}$ ) relative to control aorta (Fig. 4D). PET-CT imaging  
246 revealed profound mineralization in the aortic sinus and ascending aorta of *Klotho* mutant ( $Kl^{kl/kl}$ )  
247 mice, but not in a control heterozygous ( $Kl^{kl/+}$ ) littermate (Fig. 4E, F). Together, these results  
248 confirmed that homozygosity for the *Klotho* mutation amplifies BMP signaling and calcification in  
249 the aorta.

### 250 **The *Bmp2* UCS represses BMP signaling levels in calcified aorta from *Klotho* mutant** 251 **mice**

252 We showed earlier that the *Bmp2* UCS repressed mRNA abundance and BMP signaling in non-  
253 calcified control aorta from males, but not females (Fig. 3A - C). Consistent with our findings in  
254 control aorta from males (Fig. 3B, C), UCS deletion significantly stimulated aortic BMP signaling  
255 in male *Klotho* homozygotes ( $Kl^{kl/kl}$ ). BMP signaling was about 2-fold higher in heterozygotes  
256 ( $Bmp2^{+/\Delta UCS}$ ,  $p = 0.01$ ) and homozygotes ( $Bmp2^{\Delta UCS/\Delta UCS}$ ,  $p = 0.02$ ) relative to wild type

257 (*Bmp2*<sup>+/+</sup>) mice (Fig. 5A, B). In contrast to control aorta from females, UCS deletion also  
258 stimulated aortic BMP signaling by 1.6-fold in female *Klotho* homozygotes relative to wildtype  
259 females (Fig. 5A, B;  $p = 0.02$ ). The observed elevation in BMP signaling did not lead to an  
260 obvious stimulation of calcium levels in mice lacking the UCS (Fig. 5C).

### 261 **The *Bmp2* UCS influences body and heart weights**

262 We observed that the inheritance of UCS deletion allele varied with *Klotho* genotype (Fig. 2D).  
263 Therefore, we tested whether deleting the *Bmp2* UCS impacts overall health as assessed by the  
264 body weights of the mice. *Bmp2* genotype did not impact the body weight for control animals of  
265 both sexes (Fig. 6A). As expected, female control mice weighed about 20% less than males for  
266 all 3 *Bmp2* genotypes ( $p = 3.96 \times 10^{-18}$ ). The severe runting phenotype caused homozygous  
267 *Klotho* mutant mice with the wild type *Bmp2* genotype to weigh about a third that of the control  
268 mice. Curiously, the typical male to female weight ratio was reversed in *Klotho* mutant  
269 homozygotes. Specifically, female *Klotho* homozygotes with the wild type *Bmp2* genotype  
270 weighed about 22% more than male homozygotes (Fig. 6A,  $p = 0.04$ ).  
271 Homozygous deletion of the UCS (*Bmp2* <sup>$\Delta$ UCS/ $\Delta$ UCS</sup>) increased the weight of male *Klotho*  
272 homozygotes by 40% (Fig. 6A,  $p = 0.0003$ ). Because UCS deletion failed to impact females  
273 similarly, the mice lacking the *Bmp2* UCS exhibited the usual male to female weight ratio with  
274 males weighing 23% more than females (Fig. 6A,  $p = 0.008$ ). These results suggest a sex-  
275 specific difference in the impact of *Bmp2* UCS on the overall physiology of *Klotho* homozygotes.  
276 To test if this *Bmp2* allele influenced overall cardiovascular health, we next compared the heart  
277 weights of male and female mice with all *Bmp2* and *Klotho* genotypes (Fig. 6B). A modest  
278 increase in the heart weights of control mice was associated with UCS deletion. Because heart  
279 weight is normally proportional to body weight, we calculated relative heart weights. The small,  
280 but significant, increase in the heart weight of female *Klotho* controls lacking the UCS was  
281 retained after normalizing to body weight (Fig. 6C,  $p = 0.04$ ).

282 Deletion of the UCS affected absolute heart weight more dramatically in *Klotho* homozygotes of  
283 both sexes. In male and female *Klotho* homozygotes, homozygous UCS deletion  
284 (*Bmp2*<sup>ΔUCS/ΔUCS</sup>) significantly increased absolute heart weight by 75% in males ( $p = 0.0002$ ) and  
285 40% in females ( $p = 0.004$ , Fig. 6B). Female heart weight normalized to body weight also was  
286 increased by nearly 50% ( $p = 0.005$ , Fig. 6C). In male *Klotho* homozygotes, a trend towards  
287 higher relative weight remained (Fig. 6C) despite the increased overall body weight associated  
288 with UCS deletion (Fig. 6A). These results suggest that an intact *Bmp2* UCS protects from an  
289 enlarged heart.

## 290 Discussion

291 Our objective was to test the role of an extraordinarily conserved *Bmp2* regulatory element, the  
292 UCS, in the aorta from control adult mice and in mice with genetically induced vascular  
293 calcification associated with severely reduced renal function. We used a new *Bmp2* allele  
294 without the UCS that increased *Bmp2* RNA and BMP signaling in embryos (31). As we  
295 observed in embryos, the UCS can repress BMP synthesis in the adult aorta. However, we also  
296 discovered that the UCS functions differently between male and female mice. We will first  
297 discuss our findings in males and then compare and contrast these findings to those in females.  
298 Our previous study using a *lacZ* reporter gene controlled by the distal *Bmp2* promoter and the  
299 *Bmp2* 3'UTR showed that Cre-mediated deletion of the *Bmp2* UCS induced robust gene  
300 expression in the aorta, coronary vasculature, and cardiac valves (25). However, this reporter  
301 gene lacked the proximal promoter, intronic regulatory elements, and long-range *cis*-regulatory  
302 elements. Thus, the reporter gene only partly recapitulated endogenous *Bmp2* gene expression  
303 patterns (19,27). Using our new *Bmp2* allele lacking the UCS (*Bmp2*<sup>ΔUCS</sup>), we showed that the  
304 UCS represses *Bmp2* mRNA abundance and BMP signaling in embryos (31). In the present  
305 study, we demonstrated for the first time that the UCS also represses *Bmp2* RNA abundance  
306 and BMP signaling in control adult male aorta (Fig. 3A - C). This observation, which is  
307 consistent with all previous studies using reporter genes *in vitro* and *in vivo* (20,24,25,27),

## Bmp2 Gene Regulation in the Aorta

308 indicates that the UCS can restrain this pro-calcific growth factor in healthy cardiovascular  
309 tissues.

310 In contrast to healthy vascular cells, increased levels of BMP2 are tightly associated with  
311 pathological calcification of the coronary vasculature (5,6,11,12). To understand why this pro-  
312 calcific protein is induced in physiologies such as aging and reduced renal function, we also  
313 assessed the capacity of the UCS to restrain BMP signaling in aortic tissue undergoing  
314 pathological calcification. In mice bearing the wild type *Bmp2* genotype, but homozygous for  
315 the hypomorphic *Klotho* mutation, BMP signaling, and calcium levels were increased in the  
316 aorta (Fig. 4B - F). This mirrors the increased levels observed in aortic valves from *Klotho* null  
317 mice (29). As in control males, the *Bmp2* UCS repressed BMP signaling in the aorta from male  
318 *Klotho* mutant mice (Fig. 5A, B). A trend towards increased aortic calcium levels with *Bmp2*  
319 UCS deletion was observed in male *Klotho* mutant mice (Fig. 5C). Thus, in both control and  
320 diseased male aorta, the UCS limits BMP signaling. Our observations in males correspond with  
321 the simple hypothesis that a functional UCS protects against excessive BMP signaling and  
322 maybe against calcification.

323 Interestingly, results in female mice suggest a more complex story. First, basal BMP signaling  
324 was 2-fold higher in aorta from control females relative to males (Fig. 3B). Second, unlike in  
325 males, the *Bmp2* UCS failed to repress *Bmp2* mRNA and BMP signaling in control non-calcified  
326 aorta from females (Fig. 3A - C). Finally, basal aortic calcium was 36% higher in females  
327 relative to males (Fig. 3G). However, as in both healthy control and *Klotho* mutant male mice,  
328 the UCS did repress aortic BMP signaling in the female *Klotho* homozygotes. This suggests that  
329 *Klotho*-associated renal disease stimulates the braking action of the UCS on aortic BMP  
330 signaling in females. Potential sex-related differences in *Bmp2* gene regulatory and BMP  
331 signaling mechanisms will be further investigated (33).

332 The female hormone estrogen may play a role in these differences. Indeed, previous findings in  
333 cell culture indicate that estrogen directly induces *Bmp2* transcription (34,37). We confirmed

## Bmp2 Gene Regulation in the Aorta

334 that estrogen stimulates *Bmp2* RNA abundance in the intact aorta (Fig. 3F). The differential  
335 impact of deleting the UCS suggests additional dissimilarities in the post-transcriptional  
336 processes that regulate BMP2 synthesis in males and females. Sex-related differences in  
337 *Bmp2* gene regulation may be clinically relevant as significant disparities in incidence,  
338 prognosis, and response to treatments for arterial diseases occur between men and women  
339 (38-40).

340 BMPs were defined by their ability to induce bone from mesenchymal tissues (4). Indeed, all  
341 major forms of cardiovascular calcium deposition (aortic valve, medial artery, and  
342 atherosclerotic calcification) proceed by mechanisms resembling bone formation (5,9,12,42).  
343 However, the increased BMP signaling associated with UCS deletion did not lead clearly to a  
344 corresponding increase in aortic calcification. Thus, loss of the UCS-mediated repression of  
345 *Bmp2* may not be a sufficient trigger to induced aortic calcification. Indeed, this post-  
346 transcriptional repression is only one of the numerous mechanisms that control *Bmp2* gene  
347 expression and BMP signaling (19). BMP signaling can activate repressors such as the  
348 extracellular antagonist NOGGIN, the intracellular repressor SMAD6, and the miRNAs that  
349 repress BMP receptors (43-45). Furthermore, a multitude of positive and negative regulators  
350 control the differentiation program leading from bone progenitors to committed osteoprogenitors  
351 to differentiating osteoblasts and finally to mature osteoblasts that cause mineralization (46).  
352 The redundant feedback mechanisms that dampen BMP signaling along with downstream  
353 regulators of osteogenesis would buffer the impact of reduced UCS function on vascular  
354 calcification.

355 Our focus in this study was the regulatory impact of the UCS on *Bmp2* gene expression, BMP  
356 signaling, and calcification. However, we observed that the UCS deletion allele modified the  
357 *Klotho* phenotype more generally and in a manner also distinguished by sex. First, deletion of  
358 the UCS significantly increased the weight of male *Klotho* homozygotes, but not female  
359 homozygotes (Fig. 6A). A second phenotype was an increase in heart weight. Although most

360 notable in *Klotho* homozygotes of both sexes, the weights of control female hearts were  
361 significantly elevated by deletion of the UCS within only 6 -7 weeks of age (Fig. 6B, C). The  
362 UCS deletion allele dramatically altered embryonic morphogenesis and viability, but only in a  
363 subset of offspring (31). Because the penetrance of severe embryonic malformations correlated  
364 with the level of BMP signaling, we proposed that other BMP pathway regulators compensated  
365 for deletion of the repressive UCS. The surviving pups – the subjects of this study – are those  
366 with adequate regulation. In the survivors, subtler congenital defects, *e.g.*, of the valves, are  
367 possible. Indeed, the edema observed in some embryos is consistent with reduced cardiac  
368 function (31). The impact of such developmental anomalies may appear sooner in mice  
369 subjected to additional cardiovascular stress, such as the renal failure associated with KLOTTHO  
370 loss of function. The extraordinary conservation of the UCS is consistent with evolutionary drive  
371 to maintain BMP signaling within a narrow developmentally tolerated range. If the remaining  
372 redundant regulatory mechanisms are severely inadequate, then catastrophic embryonic  
373 malformations may occur. Less severe regulatory changes may reveal themselves only in the  
374 contexts of aging or pathological stresses.

375 **Acknowledgments:** We thank Drs. Stella Elkabes and Li Ni for the gift of the aorta from  
376 ovariectomized females. We also appreciate the part-time assistance of students Annica Tehim  
377 (Rutgers New Jersey Medical School), Amy Song (The College of NJ), Irina Kleiman and Risha  
378 Patel (Rutgers School of Graduate Studies).

### 379 **References**

- 380 1. Benjamin EJ, Virani SS, Callaway CW, et al. Heart Disease and Stroke Statistics—2018  
381 Update: A Report From the American Heart Association. *Circulation*. 2018.
- 382 2. National Chronic Kidney Disease Fact Sheet. . Available at.
- 383 3. Vattikuti R, Towler DA. Osteogenic regulation of vascular calcification: an early  
384 perspective. *Am J Physiol Endocrinol Metab*. 2004;286(5):E686-696.
- 385 4. Urist MR. Bone: formation by autoinduction. *Science*. 1965;150(3698):893-899.
- 386 5. Towler DA. Commonalities Between Vasculature and Bone: An Osseocentric View of  
387 Arteriosclerosis. *Circulation*. 2017;135(4):320-322.
- 388 6. Bostrom K, Watson KE, Horn S, Wortham C, Herman IM, Demer LL. Bone  
389 morphogenetic protein expression in human atherosclerotic lesions. *The Journal of clinical*  
390 *investigation*. 1993;91(4):1800-1809.

- 391 7. Balachandran K, Sucosky P, Jo H, Yoganathan AP. Elevated cyclic stretch induces  
392 aortic valve calcification in a bone morphogenetic protein-dependent manner. *Am J Pathol.*  
393 2010;177(1):49-57.
- 394 8. Kaden JJ, Bickelhaupt S, Grobholz R, et al. Expression of bone sialoprotein and bone  
395 morphogenetic protein-2 in calcific aortic stenosis. *J Heart Valve Dis.* 2004;13(4):560-566.
- 396 9. Miller JD, Weiss RM, Serrano KM, et al. Evidence for active regulation of pro-osteogenic  
397 signaling in advanced aortic valve disease. *Arterioscler Thromb Vasc Biol.* 2010;30(12):2482-  
398 2486.
- 399 10. Seya K, Yu Z, Kanemaru K, et al. Contribution of bone morphogenetic protein-2 to aortic  
400 valve calcification in aged rat. *Journal of pharmacological sciences.* 2011;115(1):8-14.
- 401 11. Mohler ER, 3rd, Gannon F, Reynolds C, Zimmerman R, Keane MG, Kaplan FS. Bone  
402 formation and inflammation in cardiac valves. *Circulation.* 2001;103(11):1522-1528.
- 403 12. Goumans MJ, Zwijsen A, Ten Dijke P, Bailly S. Bone Morphogenetic Proteins in  
404 Vascular Homeostasis and Disease. *Cold Spring Harb Perspect Biol.* 2017;10:2.
- 405 13. Yang X, Meng X, Su X, et al. Bone morphogenetic protein 2 induces Runx2 and  
406 osteopontin expression in human aortic valve interstitial cells: role of Smad1 and extracellular  
407 signal-regulated kinase 1/2. *The Journal of thoracic and cardiovascular surgery.*  
408 2009;138(4):1008-1015.
- 409 14. Cheng SL, Shao JS, Charlton-Kachigian N, Loewy AP, Towler DA. MSX2 promotes  
410 osteogenesis and suppresses adipogenic differentiation of multipotent mesenchymal  
411 progenitors. *The Journal of biological chemistry.* 2003;278(46):45969-45977.
- 412 15. Wirrig EE, Hinton RB, Yutzey KE. Differential expression of cartilage and bone-related  
413 proteins in pediatric and adult diseased aortic valves. *Journal of molecular and cellular*  
414 *cardiology.* 2011;50(3):561-569.
- 415 16. Osman L, Yacoub MH, Latif N, Amrani M, Chester AH. Role of human valve interstitial  
416 cells in valve calcification and their response to atorvastatin. *Circulation.* 2006;114(1  
417 Suppl):1547-552.
- 418 17. Nigam V, Srivastava D. Notch1 represses osteogenic pathways in aortic valve cells.  
419 *Journal of molecular and cellular cardiology.* 2009;47(6):828-834.
- 420 18. Yu Z, Seya K, Daitoku K, Motomura S, Fukuda I, Furukawa K. Tumor necrosis factor-  
421 alpha accelerates the calcification of human aortic valve interstitial cells obtained from patients  
422 with calcific aortic valve stenosis via the BMP2-Dlx5 pathway. *The Journal of pharmacology and*  
423 *experimental therapeutics.* 2011;337(1):16-23.
- 424 19. Rogers MB, Shah TA, Shaikh NN. Turning Bone Morphogenetic Protein 2 (BMP2) on  
425 and off in Mesenchymal Cells. *Journal of cellular biochemistry.* 2015;116(10):2127-2138.
- 426 20. Fotinos A, Fritz DT, Lisica S, Liu Y, Rogers MB. Competing Repressive Factors Control  
427 Bone Morphogenetic Protein 2 (BMP2) in Mesenchymal Cells. *Journal of cellular biochemistry.*  
428 2016;117(2):439-447.
- 429 21. Abrams KL, Xu J, Nativelle-Serpentini C, Dabirshahsahebi S, Rogers MB. An  
430 evolutionary and molecular analysis of Bmp2 expression. *J Biol Chem.* 2004;279(16):15916-  
431 15928.
- 432 22. Fritz DT, Jiang S, Xu J, Rogers MB. A polymorphism in a conserved posttranscriptional  
433 regulatory motif alters bone morphogenetic protein 2 (BMP2) RNA:protein interactions. *Mol*  
434 *Endocrinol.* 2006;20(7):1574-1586.
- 435 23. Fritz DT, Liu D, Xu J, Jiang S, Rogers MB. Conservation of Bmp2 post-transcriptional  
436 regulatory mechanisms. *J Biol Chem.* 2004;279(47):48950-48958.
- 437 24. Devaney JM, Tosi LL, Fritz DT, et al. Differences in fat and muscle mass associated with  
438 a functional human polymorphism in a post-transcriptional BMP2 gene regulatory element.  
439 *Journal of cellular biochemistry.* 2009;107(6):1073-1082.
- 440 25. Kruithof BP, Fritz DT, Liu Y, et al. An autonomous BMP2 regulatory element in  
441 mesenchymal cells. *Journal of cellular biochemistry.* 2011;112(2):666-674.



- 442 26. Jiang S, Fritz DT, Rogers MB. A conserved post-transcriptional BMP2 switch in lung  
443 cells. *Journal of cellular biochemistry*. 2010;110(2):509-521.
- 444 27. Kruithof BP, Xu J, Fritz DT, Cabral CS, Gaussin V, Rogers MB. An in vivo map of bone  
445 morphogenetic protein 2 post-transcriptional repression in the heart. *Genesis*. 2011;49(11):841-  
446 850.
- 447 28. Kuro-o M, Matsumura Y, Aizawa H, et al. Mutation of the mouse *klotho* gene leads to a  
448 syndrome resembling ageing. *Nature*. 1997;390(6655):45-51.
- 449 29. Gomez-Stallons MV, Wirrig-Schwendeman EE, Hassel KR, Conway SJ, Yutzey KE.  
450 Bone Morphogenetic Protein Signaling Is Required for Aortic Valve Calcification. *Arterioscler*  
451 *Thromb Vasc Biol*. 2016;36(7):1398-1405.
- 452 30. Neven E, D'Haese PC. Vascular calcification in chronic renal failure: what have we  
453 learned from animal studies? *Circ Res*. 2011;108(2):249-264.
- 454 31. Shah TA, Zhu Y, Shaikh NN, Harris MA, Harris SE, Rogers MB. Characterization of new  
455 bone morphogenetic protein (Bmp)-2 regulatory alleles. *Genesis*. 2017;55(7):e23035.
- 456 32. Morishita K, Shirai A, Kubota M, et al. The progression of aging in *klotho* mutant mice  
457 can be modified by dietary phosphorus and zinc. *J Nutr*. 2001;131(12):3182-3188.
- 458 33. Shah TA, Rogers MB. Unanswered Questions Regarding Sex and BMP/TGF- $\beta$   
459 Signaling. *Journal of Developmental Biology*. 2018;6(2)(14).
- 460 34. Zhou S, Turgeman G, Harris SE, et al. Estrogens activate bone morphogenetic protein-2  
461 gene transcription in mouse mesenchymal stem cells. *Molecular endocrinology (Baltimore, Md)*.  
462 2003;17(1):56-66.
- 463 35. Frick KM. Estrogens and age-related memory decline in rodents: what have we learned  
464 and where do we go from here? *Horm Behav*. 2009;55(1):2-23.
- 465 36. Nelson JF, Felicio LS, Osterburg HH, Finch CE. Altered profiles of estradiol and  
466 progesterone associated with prolonged estrous cycles and persistent vaginal cornification in  
467 aging C57BL/6J mice. *Biol Reprod*. 1981;24(4):784-794.
- 468 37. Zhou S, Zilberman Y, Wassermann K, Bain SD, Sadovsky Y, Gazit D. Estrogen  
469 modulates estrogen receptor alpha and beta expression, osteogenic activity, and apoptosis in  
470 mesenchymal stem cells (MSCs) of osteoporotic mice. *J Cell Biochem Suppl*. 2001;Suppl  
471 36:144-155.
- 472 38. Robinet P, Milewicz DM, Cassis LA, Leeper NJ, Lu HS, Smith JD. Consideration of Sex  
473 Differences in Design and Reporting of Experimental Arterial Pathology Studies-Statement  
474 From ATVB Council. *Arterioscler Thromb Vasc Biol*. 2018;38(4).
- 475 39. Chow JT, Khosla S, Melton LJ, 3rd, Atkinson EJ, Camp JJ, Kearns AE. Abdominal aortic  
476 calcification, BMD, and bone microstructure: a population-based study. *J Bone Miner Res*.  
477 2008;23(10):1601-1612.
- 478 40. Jayalath RW, Mangan SH, GollEDGE J. Aortic calcification. *Eur J Vasc Endovasc Surg*.  
479 2005;30(5):476-488.
- 480 41. Rigor and Reproducibility. NIH Website. . Available at.
- 481 42. Shao JS, Cai J, Towler DA. Molecular mechanisms of vascular calcification: lessons  
482 learned from the aorta. *Arterioscler Thromb Vasc Biol*. 2006;26(7):1423-1430.
- 483 43. Gazzero E, Minetti C. Potential drug targets within bone morphogenetic protein  
484 signaling pathways. *Curr Opin Pharmacol*. 2007;7(3):325-333.
- 485 44. Sun Q, Mao S, Li H, Zen K, Zhang CY, Li L. Role of miR-17 family in the negative  
486 feedback loop of bone morphogenetic protein signaling in neuron. *PLoS One*.  
487 2013;8(12):e83067.
- 488 45. Mulloy B, Rider CC. The Bone Morphogenetic Proteins and Their Antagonists. *Vitamins*  
489 *and hormones*. 2015;99:63-90.
- 490 46. Salazar VS, Ohte S, Capelo LP, Gamer L, Rosen V. Specification of osteoblast cell fate  
491 by canonical Wnt signaling requires *Bmp2*. *Development*. 2016;143(23):4352-4367.

## Bmp2 Gene Regulation in the Aorta

- 492 47. Carreira AC, Alves GG, Zambuzzi WF, Sogayar MC, Granjeiro JM. Bone Morphogenetic  
493 Proteins: structure, biological function and therapeutic applications. *Arch Biochem Biophys*.  
494 2014;561:64-73.
- 495 48. Shao Y, Chen QZ, Zeng YH, et al. All-trans retinoic acid shifts rosiglitazone-induced  
496 adipogenic differentiation to osteogenic differentiation in mouse embryonic fibroblasts. *Int J Mol*  
497 *Med*. 2016;38(6):1693-1702.
- 498 49. Shen J, James AW, Zhang X, et al. Novel Wnt Regulator NEL-Like Molecule-1  
499 Antagonizes Adipogenesis and Augments Osteogenesis Induced by Bone Morphogenetic  
500 Protein 2. *Am J Pathol*. 2016;186(2):419-434.
- 501 50. Vanhatupa S, Ojansivu M, Autio R, Juntunen M, Miettinen S. Bone Morphogenetic  
502 Protein-2 Induces Donor-Dependent Osteogenic and Adipogenic Differentiation in Human  
503 Adipose Stem Cells. *Stem Cells Transl Med*. 2015;4(12):1391-1402.
- 504 51. Kolodgie FD, Yahagi K, Mori H, et al. High-risk carotid plaque: lessons learned from  
505 histopathology. *Semin Vasc Surg*. 2017;30(1):31-43.
- 506 52. Simard L, Cote N, Dagenais F, et al. Sex-Related Discordance Between Aortic Valve  
507 Calcification and Hemodynamic Severity of Aortic Stenosis: Is Valvular Fibrosis the  
508 Explanation? *Circ Res*. 2017;120(4):681-691.
- 509  
510

## Bmp2 Gene Regulation in the Aorta

511 **Figure 1. Experimental Controls. A, B.** Grinding tissue with glass beads does not significantly  
512 affect calcium or protein yield. Whole aorta was ground in liquid nitrogen either with or without  
513 glass beads. Frozen ground powder tissue was split two ways for protein and calcium assays.  
514 **A.** Effect of glass beads on calcium, protein and pSMAD 1/5/9(8) levels. Duplicate  
515 measurements are presented with range. Experiments were repeated twice with similar results.  
516 **B.** Representative blots showing pSMAD 1/5/9(8), actin levels and the Ponceau S stained  
517 membrane after transfer. The positive control lane (+ Ctrl) was loaded with lysate from MC3T3-  
518 E1 cells transfected with a *Bmp2* expression plasmid. **C, D.** Validation of the phospho-SMAD  
519 1/5/9(8) antibody. MC3T3-E1 (**C**) and C3H10T1/2 (**D**) cells were transfected with an expression  
520 plasmid encoding BMP2 (B2) or luciferase (Luc) (25). Cells were then lysed in RIPA buffer and  
521 subjected to western blotting as described in the experimental procedures section. These  
522 representative blots show that pSMAD1/5/9(8) levels were induced in cells transfected with the  
523 *Bmp2* expressing plasmid relative to the luciferase plasmid. Actin levels and a Ponceau S  
524 stained membrane are shown as loading controls.  
525

Bmp2 Gene Regulation in the Aorta

**A**

|                                  | - Beads    | + Beads     |
|----------------------------------|------------|-------------|
| Calcium/<br>Protein              | 74.3 ± 1.5 | 72.8 ± 12.6 |
| mg Pro/mg<br>tissue              | 33.1 ± 2.8 | 39.6 ± 2.8  |
| pSMAD/Act<br>norm. to -<br>beads | 1.0        | 0.88 ± 0.25 |

**B**

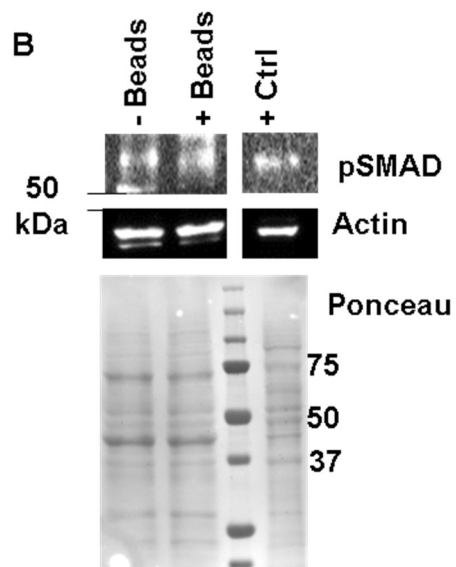

**C**

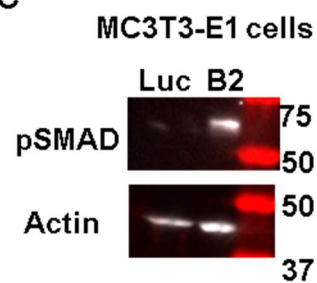

**D**

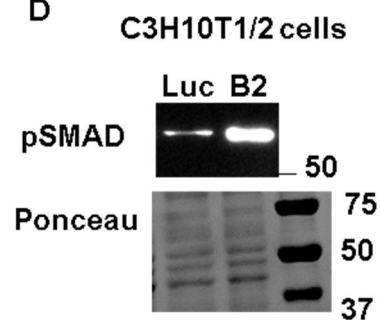

526

527

528 **Figure 2. Apparent interaction between *Bmp2* and *Klotho* mutant alleles.** Mice

529 heterozygous for the *Bmp2* allele lacking the UCS (*Bmp2*<sup>+/ $\Delta$ UCS</sup>) and for the *Klotho* mutant allele

530 (*Kl*<sup>kl/+</sup>) were bred. The resulting pups were genotyped prior to weaning at approximately 4 weeks

531 of age. *Bmp2* genotypes: wild type (+/+), heterozygous (+/ $\Delta$ ), or homozygous UCS deletion ( $\Delta\Delta$ )

532 and *Klotho* genotypes: wild type (+/+), heterozygous (kl/+), or homozygous *Klotho* mutation

533 (kl/kl). **A.** Expected and observed genotypes for the breeding scheme described above.

534 Occasionally, pups were found dead between birth and weaning, but the frequency did not differ

535 from that typically observed, nor was any particular genotype obviously over-represented. **B-D**

536 illustrate relative fractions for each genotype.

537

Bmp2 Gene Regulation in the Aorta

538

A.

| Bmp2       | +/+  | +/ $\Delta$ | $\Delta/\Delta$ | +/+  | +/ $\Delta$ | $\Delta/\Delta$ | +/+   | +/ $\Delta$ | $\Delta/\Delta$ |
|------------|------|-------------|-----------------|------|-------------|-----------------|-------|-------------|-----------------|
| Klotho     | +/+  | +/+         | +/+             | kl/+ | kl/+        | kl/+            | kl/kl | kl/kl       | kl/kl           |
| Expected % | 6.25 | 12.5        | 6.25            | 12.5 | 25          | 12.5            | 6.25  | 12.5        | 6.25            |
| Observed n | 19   | 31          | 18              | 31   | 47          | 30              | 7     | 36          | 10              |
| Observed % | 8.3  | 13.5        | 7.9             | 13.5 | 20.5        | 13.1            | 3.1   | 15.7        | 4.4             |

B.

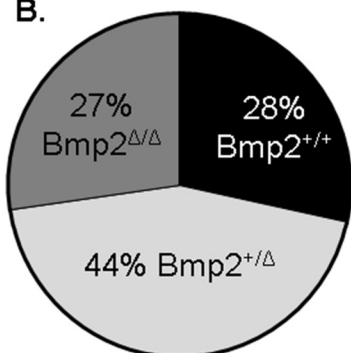

All healthy controls  
(KI<sup>+/+</sup> and KI<sup>kl/+</sup>)  
Total = 176

C.

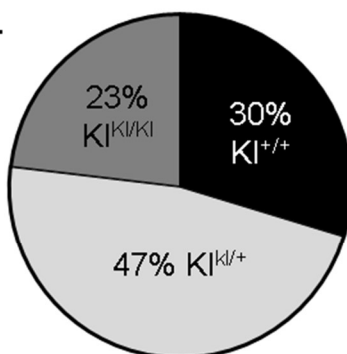

All *Bmp2*  
genotypes  
Total = 229

D.

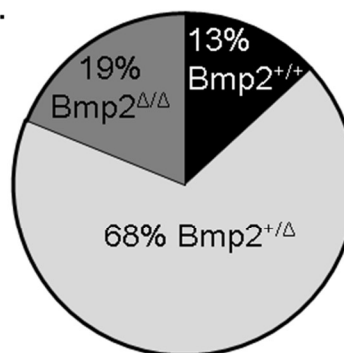

All *Klotho*  
Homozygotes (KI<sup>kl/kl</sup>)  
Total = 53

539

540

541

542 **Figure 3. *Bmp2* RNA, BMP signaling, and calcium levels in aorta from control mice with**

543 **different *Bmp2* genotypes.** Aortas were isolated from mice bearing the wild type (Wt),

544 heterozygous (+/Δ), or homozygous UCS deletion (ΔΔ) *Bmp2* genotypes between 40 and 50

545 days of age. Mice were healthy with normal kidney function (*KI*<sup>+/+</sup> and *KI*<sup>KI/+</sup>). Average parameter

546 values are presented with the standard error of the mean (SEM). **A.** *Bmp2* RNA levels

547 normalized to actin RNA levels (males, n = 12 – 21; females, n = 9 – 11). **B.** BMP signaling

548 levels as assessed by phosphorylated SMAD1/5/9(8) (pSMAD) levels normalized to total SMAD

549 1/5/9(8) (tSMAD) levels (males, n = 6 – 8; females, n = 6 – 8). **C, D.** Representative western blot

550 panels showing pSMAD1/5/9(8) and total SMAD1/5/9(8) levels, males (left) and females (right).

551 The positive control lane (+ Ctrl) was loaded with lysate from MC3T3-E1 cells transfected with a

552 *Bmp2* expression plasmid (Fig. 1). **E, F.** *Bmp2* RNA levels normalized to actin RNA levels in the

553 aorta from male and female mice (ages below each bar, n = 4 - 6) and ovariectomized (OVX)

554 and sham control mice (euthanized at 69 days, 3 weeks after operation, n = 3). **G.** Calcium

555 levels normalized to protein concentration (males, n = 18 – 26; females, n = 6 – 18). All

556 experiments were repeated at least twice with similar results. \*  $p < 0.05$ , \*\*  $p < 0.01$ , \*\*\* $p <$

557  $0.005$ , \*\*\*\*  $p < 0.001$ .

558

## Bmp2 Gene Regulation in the Aorta

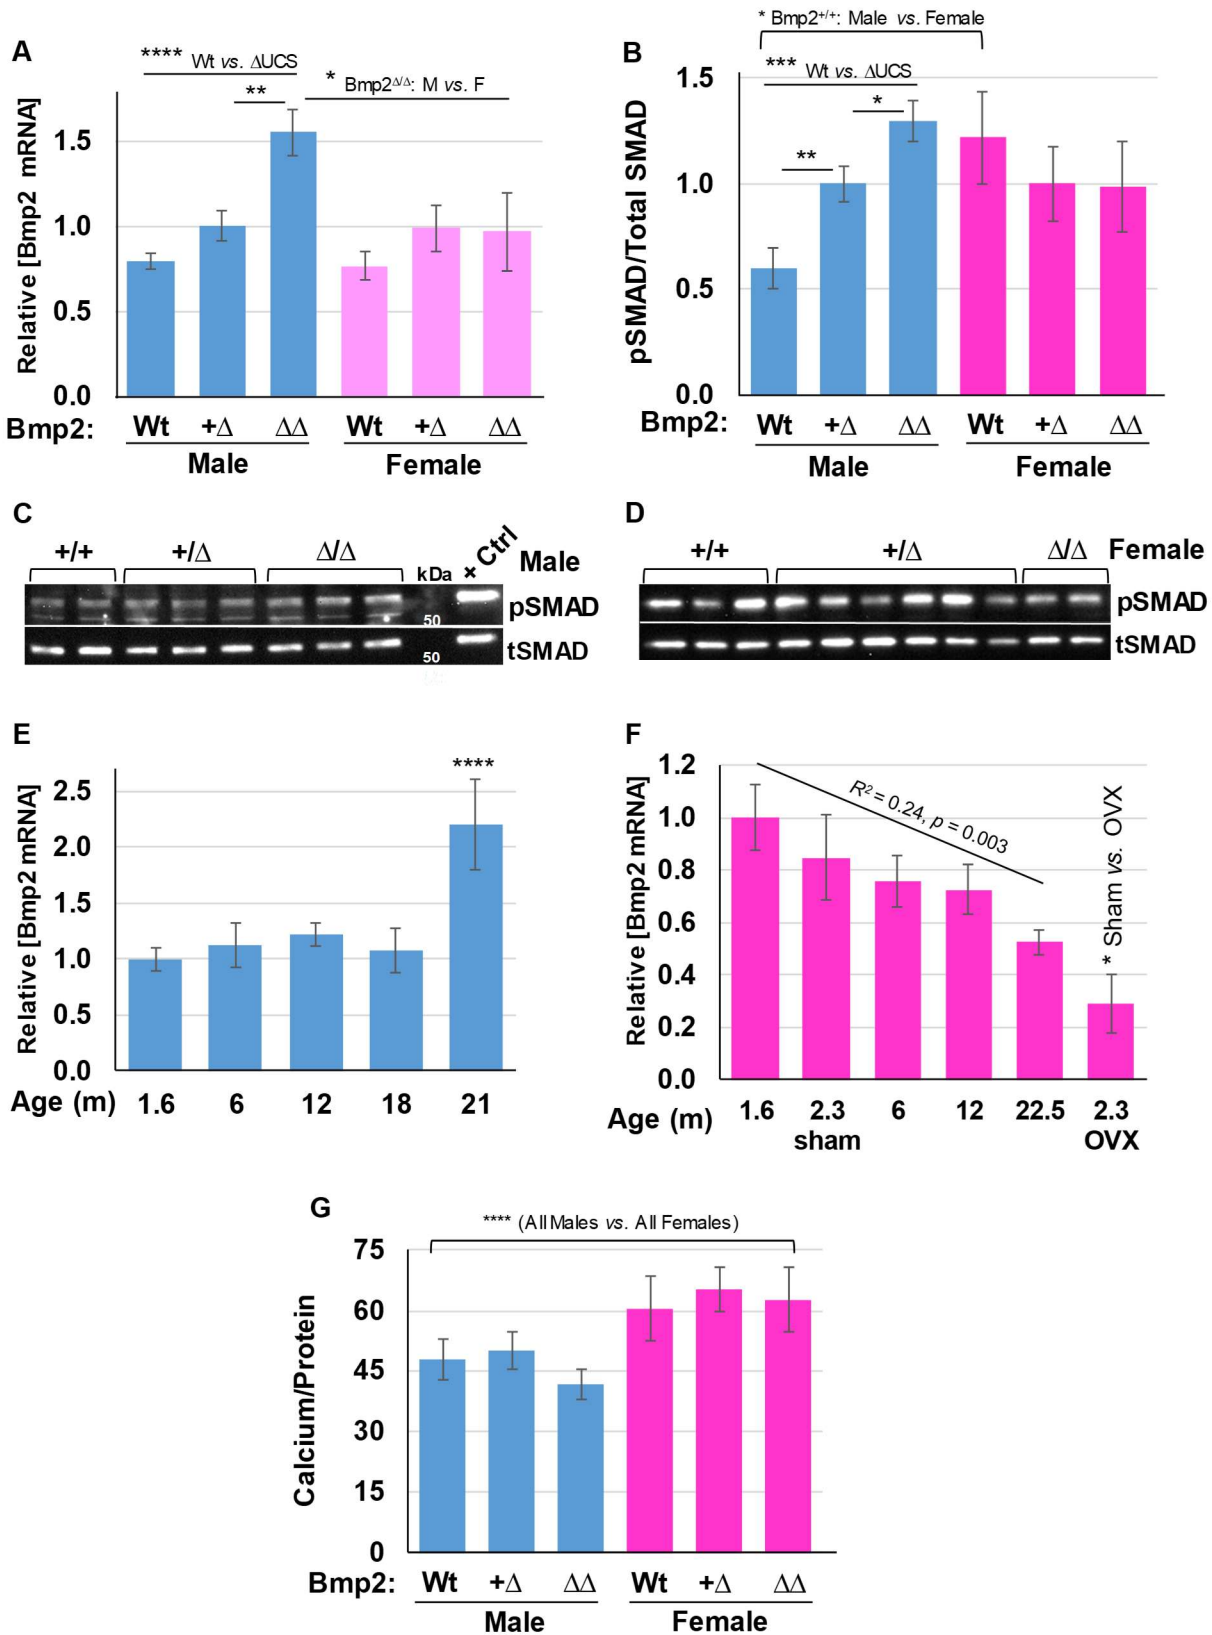



560

561 **Figure 4. *Klotho* RNA, BMP signaling levels and calcification in aorta from homozygous**  
562 ***Klotho* mutant mice.** Aortas were isolated from control (C) mice with normal kidney function  
563 ( $Kl^{+/+}$  and  $Kl^{kl/+}$ ) or mice homozygous for the *Klotho* mutation with renal disease (KK) between 40  
564 and 50 days of age. Average parameter values are presented with SEM. **A.** *Klotho* RNA levels  
565 normalized to actin RNA levels (males, n = 4 – 18; females, n = 3 – 8). *Bmp2* genotypes are  
566 indicated below each bar. **B.** BMP signaling levels as assessed by phosphorylated  
567 SMAD1/5/9(8) (pSMAD) levels normalized to total SMAD 1/5/9(8) (tSMAD) (males, n = 3 – 6;  
568 females, n = 5 – 7). All mice were wild type for *Bmp2* genotype. **C.** Representative western blot  
569 panels showing pSMAD1/5/9(8) and total SMAD1/5/9(8) levels, males (top) and females  
570 (bottom). **D.** Average calcium levels normalized to protein concentration (males, n = 9 – 18;  
571 females, n = 6 – 7). All experiments were repeated at least twice with similar results. \*  $p < 0.05$ ,  
572 \*\*\*\*  $p < 0.001$ . **E, F.** Male littermates were scanned with an Albira PET/CT Imaging System  
573 (Carestream, Rochester, NY) set at 45 kV, 400  $\mu$ A, and  $<35 \mu$ m voxel size. Voxel intensities in  
574 the reconstructed images were evaluated and segmented with VivoQuant image analysis  
575 software (version 1.23, inviCRO LLC, Boston MA). The dashed white lines mark mineralized  
576 areas of the aortic sinus and ascending aorta present in the heart (**Ht**) of the *Klotho* mutant  
577 homozygote (**F**), but not in the heterozygous control  $Kl^{kl/+}$  (**E**).

578

579

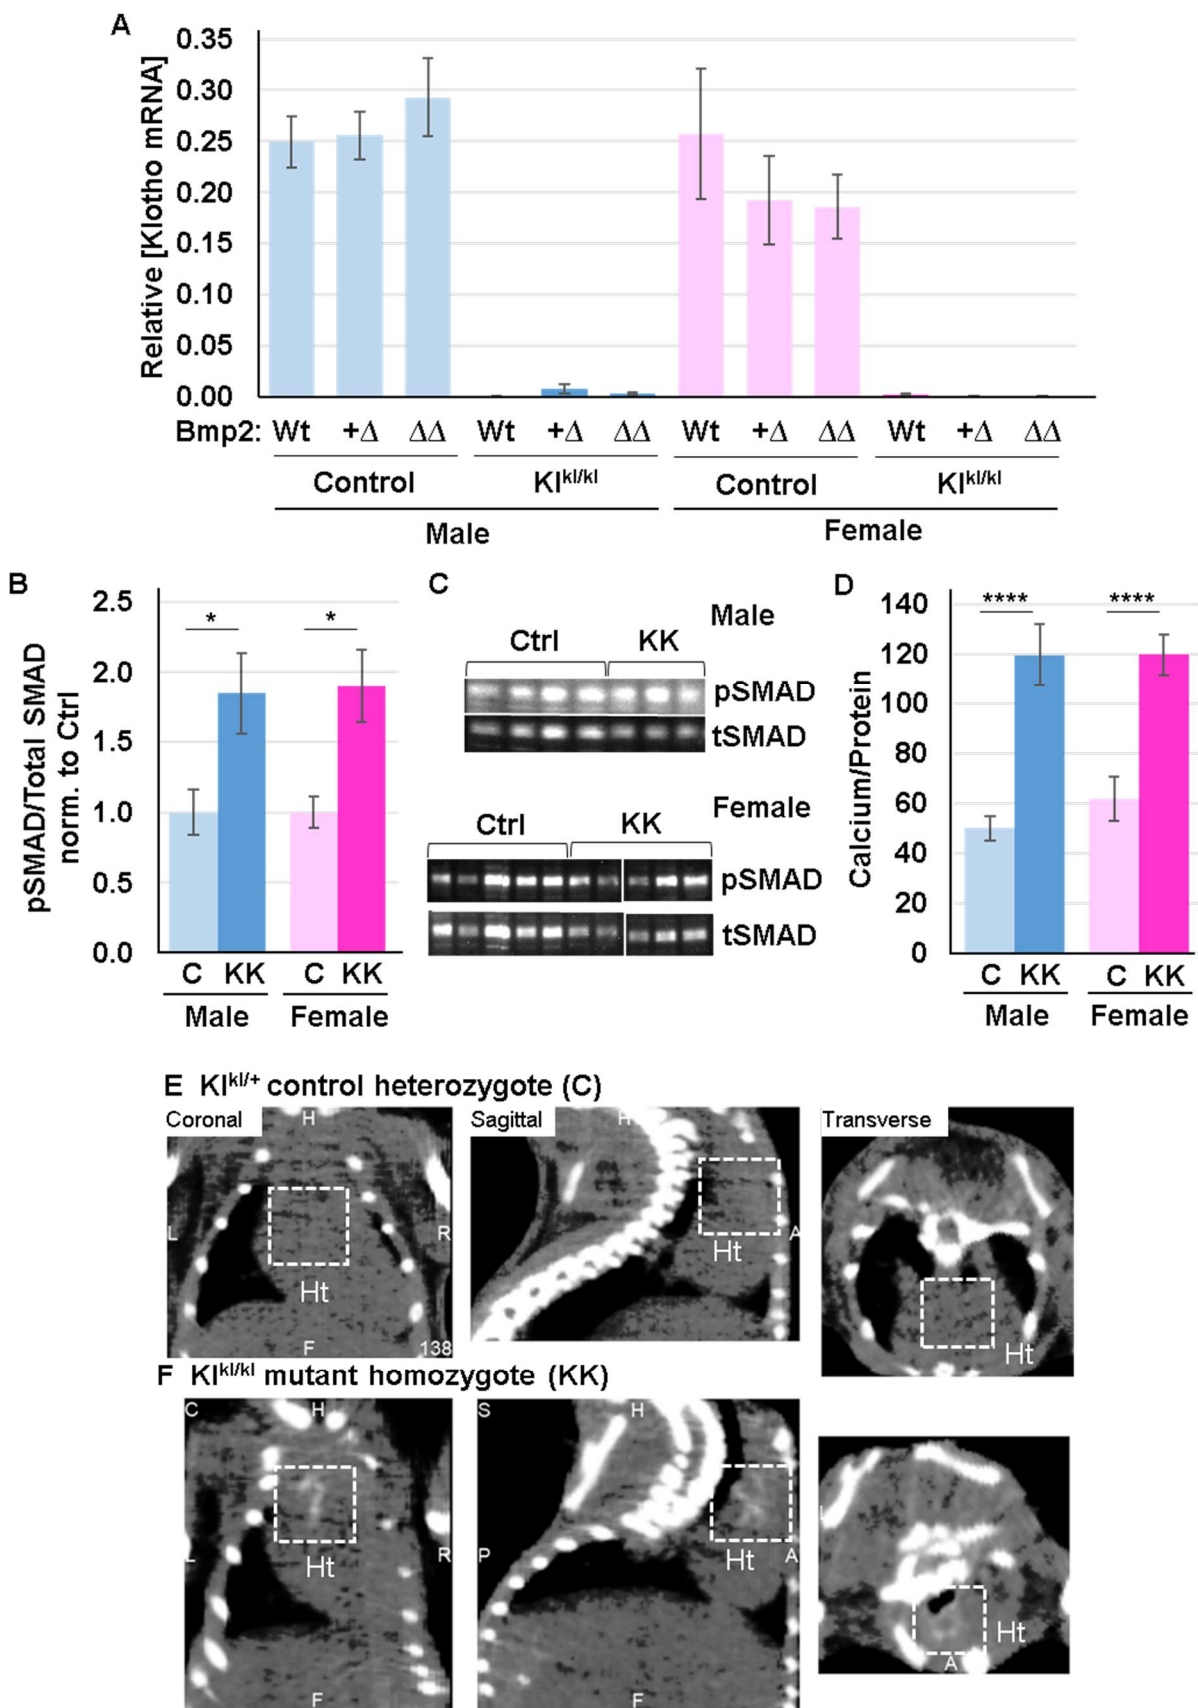

580

581 **Figure 5. BMP signaling and calcium levels in aorta from *Klotho* mutant mice with *Bmp2***  
582 **mutations.** Aortas were isolated from mice bearing the wild type (Wt), heterozygous (+/ $\Delta$ ), or  
583 homozygous UCS deletion ( $\Delta\Delta$ ) *Bmp2* genotypes between 40 and 50 days of age. All mice were  
584 homozygous for the *Klotho* mutation with renal disease ( $Kl^{kl/Kl}$ ). Average parameter values are  
585 presented as averages with SEM. **A.** BMP signaling levels as assessed by phosphorylated  
586 SMAD1/5/9(8) (pSMAD) levels normalized to total SMAD 1/5/9(8) (tSMAD) (males, n = 3 – 6;  
587 females, n = 5 – 6). **B.** Representative western blot panels showing pSMAD1/5/9(8) and total  
588 SMAD1/5/9(8) levels, males (top) and females (bottom). **C.** Calcium levels normalized to protein  
589 concentration (males, n = 4 – 9; females, n = 5 – 8). All experiments were repeated at least  
590 twice with similar results. \*  $p < 0.05$ .

591

## Bmp2 Gene Regulation in the Aorta

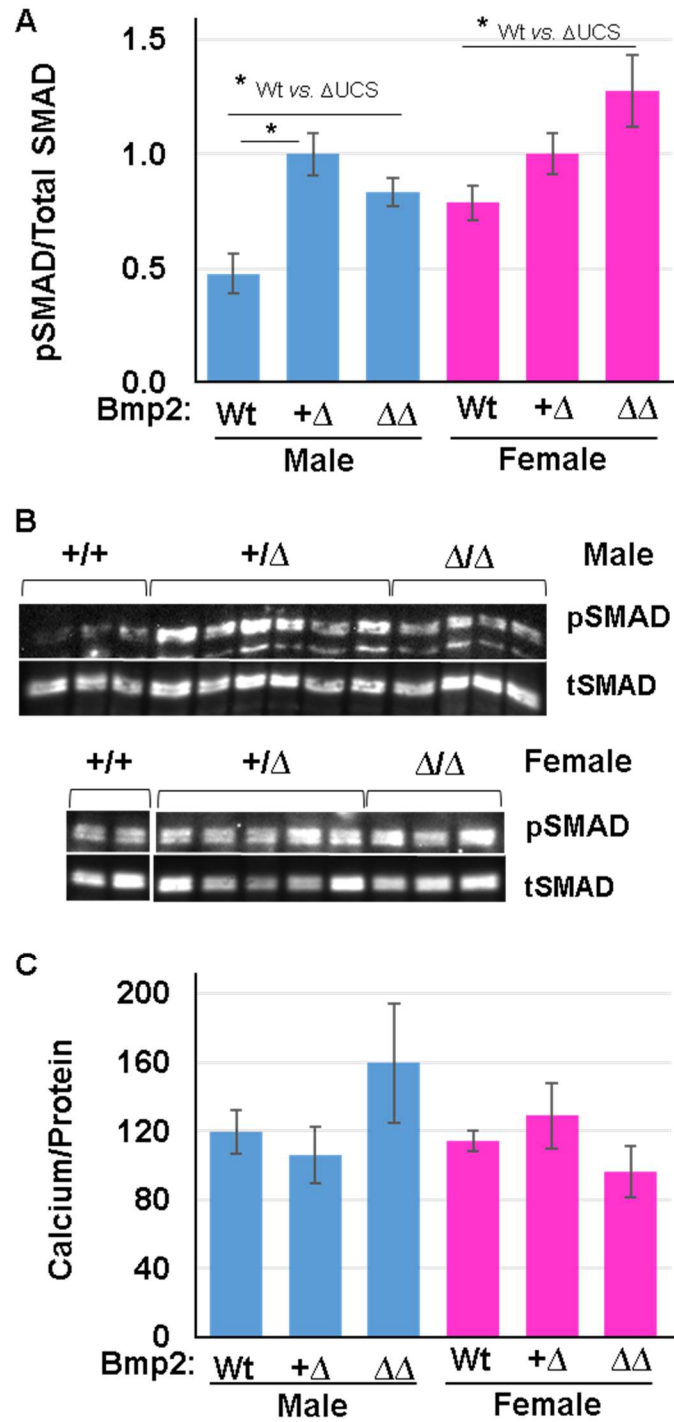

592

593

594 **Figure 6. Body and heart weights from healthy control and *Klotho* mutant mice with**

595 ***Bmp2* mutations.** Body (A) and heart weights (B) from control mice with normal kidney function

596 ( $Kl^{+/+}$  and  $Kl^{kl/+}$ ) or diseased mice homozygous for the *Klotho* mutation ( $Kl^{kl/kl}$ ) bearing the wild

597 type (Wt), heterozygous (+/ $\Delta$ ), or homozygous UCS deletion ( $\Delta\Delta$ ) *Bmp2* genotypes. Mice were

598 of age  $47.1 \pm 6$  days. Heart weight was normalized to body weight in C. Parameter values are

599 presented as averages with SEM. The number of animals is indicated under the respective

600 bars. \*  $p < 0.05$ , \*\*  $p < 0.01$ , \*\*\*  $p < 0.005$ , \*\*\*\*  $p < 0.001$ .

601

Bmp2 Gene Regulation in the Aorta

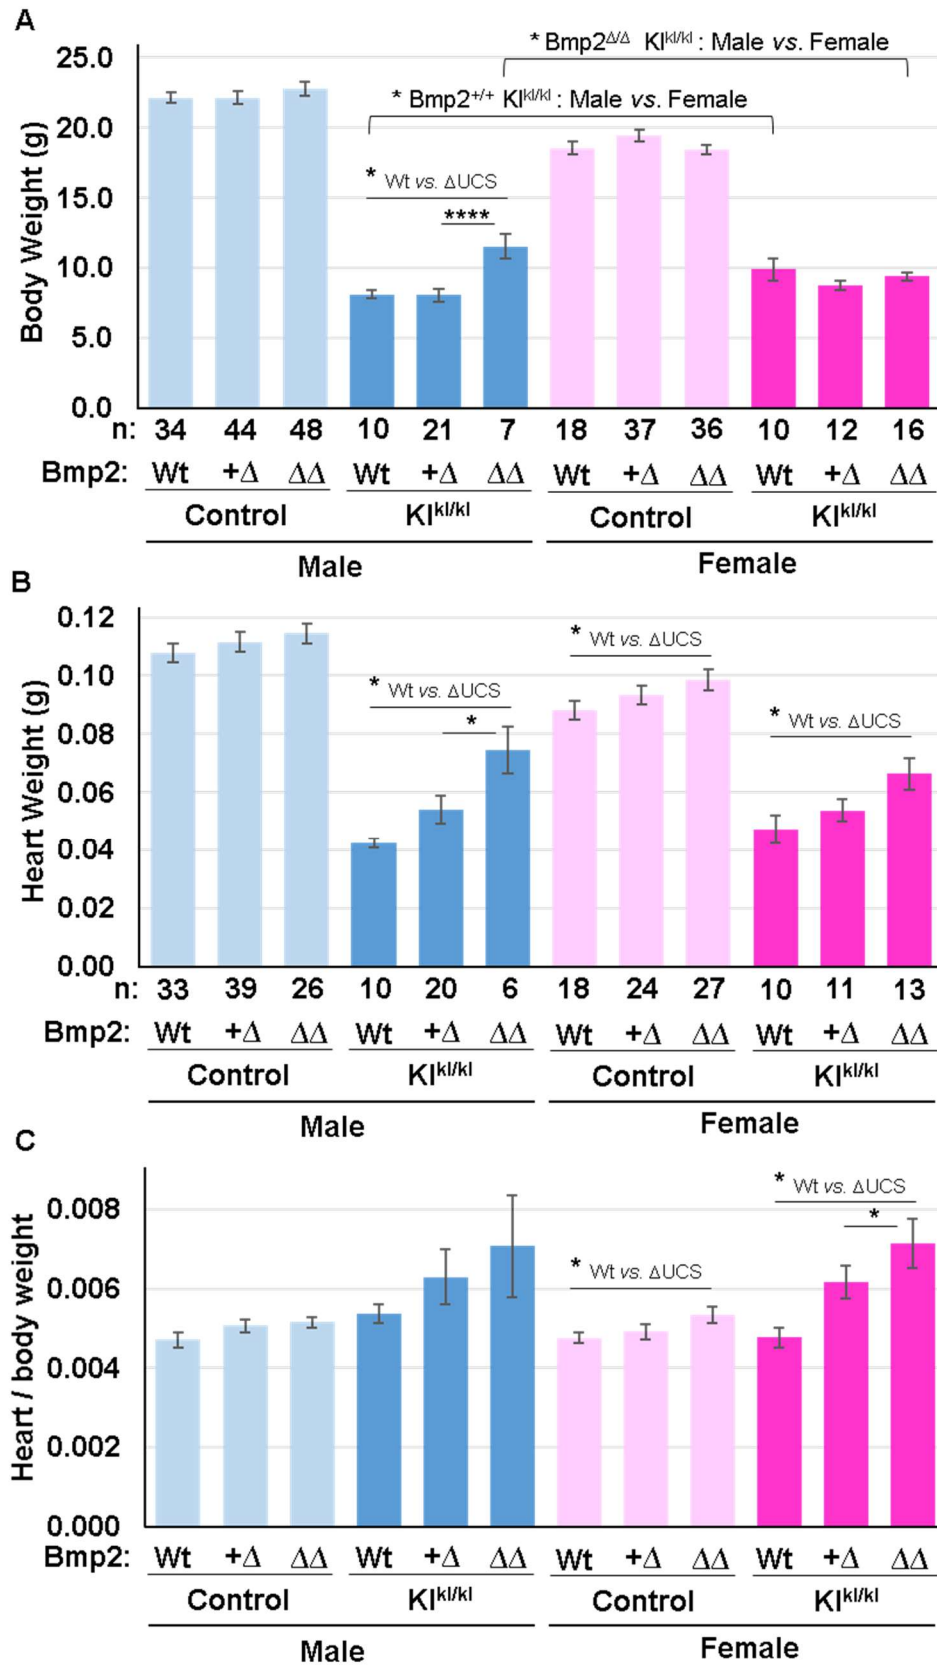

Bmp2 Gene Regulation in the Aorta

603 **Table 1. *Klotho* wild type and *Klotho* heterozygous mice are equivalent controls.** Two-way  
604 ANOVA analysis was performed to confirm that there was no significant difference between  
605 *Klotho* wildtype ( $Kl^{+/+}$ ) and *Klotho* mutant heterozygotes ( $Kl^{kl/+}$ ) mice. Parameters compared  
606 included *Bmp2* RNA, pSMAD normalized to total SMAD, aortic calcium levels, body weight,  
607 heart weight, heart weight normalized to body weight and age at euthanasia. The average  
608 (Avg.), standard deviation (SD), and number of mice assayed (n) is shown.  
609

Bmp2 Gene Regulation in the Aorta

|                          | MALES           |        |    |        |        |    | FEMALES         |        |    |        |        |    |
|--------------------------|-----------------|--------|----|--------|--------|----|-----------------|--------|----|--------|--------|----|
| Bmp2 genotype            | Wt              |        |    |        |        |    | Wt              |        |    |        |        |    |
| Klotho genotype          | Wt              |        |    | K+     |        |    | Wt              |        |    | K+     |        |    |
| Two-way Anova<br>(p val) | 0.29            |        |    |        |        |    | 0.21            |        |    |        |        |    |
| Parameters               | Avg.            | SD     | n  | Avg.   | SD     | n  | Avg.            | SD     | n  | Avg.   | SD     | n  |
| <i>Bmp2</i> RNA          | 0.72            | 0.24   | 7  | 0.78   | 0.46   | 16 | 0.57            | 0.09   | 5  | 0.89   | 0.31   | 6  |
| pSMAD/Total SMAD         | 0.61            | 0.30   | 4  | 0.58   | 0.05   | 2  | 1.16            | 0.50   | 3  | 1.15   | 0.79   | 4  |
| Calcium/Protein          | 42.1            | 21.8   | 7  | 51.2   | 21.2   | 11 | 64.8            | 23.4   | 5  | 53.2   | 14.5   | 3  |
| Body Weight (g)          | 22.3            | 2.8    | 13 | 22.3   | 1.4    | 18 | 18.2            | 1.6    | 8  | 18.8   | 2.3    | 10 |
| Heart Weight (g)         | 0.097           | 0.027  | 13 | 0.111  | 0.021  | 16 | 0.082           | 0.014  | 8  | 0.093  | 0.013  | 10 |
| Heart / Body Weight      | 0.0044          | 0.0012 | 13 | 0.0049 | 0.0010 | 15 | 0.0045          | 0.0004 | 8  | 0.0049 | 0.0006 | 10 |
| Age (d) at euthanasia    | 47.8            | 3.7    | 13 | 48.9   | 1.8    | 19 | 49.4            | 3.1    | 8  | 48.5   | 3.5    | 10 |
|                          | MALES           |        |    |        |        |    | FEMALES         |        |    |        |        |    |
| Bmp2 genotype            | +/ $\Delta$ UCS |        |    |        |        |    | +/ $\Delta$ UCS |        |    |        |        |    |
| Klotho genotype          | Wt              |        |    | K+     |        |    | Wt              |        |    | K+     |        |    |
| Two-way Anova<br>(p val) | 0.96            |        |    |        |        |    | 0.81            |        |    |        |        |    |
| Parameters               | Avg.            | SD     | n  | Avg.   | SD     | n  | Avg.            | SD     | n  | Avg.   | SD     | n  |
| <i>Bmp2</i> RNA          | 0.98            | 0.48   | 10 | 1.02   | 0.45   | 11 | 0.66            | 0.36   | 3  | 1.17   | 0.34   | 6  |
| pSMAD/Total SMAD         | 1.00            | 0.30   | 5  | 1.00   | 0.06   | 3  | 1.00            | 0.61   | 5  | 1.00   | 0.33   | 3  |
| Calcium/Protein          | 50.1            | 22.1   | 10 | 50.1   | 25.2   | 16 | 63.6            | 30.0   | 7  | 66.6   | 18.5   | 11 |
| Body Weight (g)          | 22.4            | 3.0    | 16 | 21.9   | 3.3    | 26 | 19.5            | 3.2    | 15 | 19.3   | 2.2    | 22 |
| Heart Weight (g)         | 0.11            | 0.02   | 15 | 0.11   | 0.02   | 23 | 0.09            | 0.02   | 11 | 0.10   | 0.02   | 13 |



Bmp2 Gene Regulation in the Aorta

|                                  |                  |           |          |             |           |          |                  |           |          |             |           |          |
|----------------------------------|------------------|-----------|----------|-------------|-----------|----------|------------------|-----------|----------|-------------|-----------|----------|
| Heart / Body Weight              | 0.0051           | 0.0007    | 15       | 0.0051      | 0.0012    | 22       | 0.0045           | 0.0010    | 11       | 0.0052      | 0.0008    | 12       |
| Age (d) at euthanasia            | 46.9             | 5.8       | 16       | 46.9        | 6.2       | 27       | 49.1             | 2.6       | 15       | 48.5        | 5.9       | 23       |
|                                  | <b>MALES</b>     |           |          |             |           |          | <b>FEMALES</b>   |           |          |             |           |          |
| <b>Bmp2 genotype</b>             | <b>ΔUCS/ΔUCS</b> |           |          |             |           |          | <b>ΔUCS/ΔUCS</b> |           |          |             |           |          |
| <b>Klotho genotype</b>           | <b>Wt</b>        |           |          | <b>K+</b>   |           |          | <b>Wt</b>        |           |          | <b>K+</b>   |           |          |
| <b>Two-way Anova<br/>(p val)</b> | <b>0.26</b>      |           |          |             |           |          | <b>0.52</b>      |           |          |             |           |          |
| <b>Parameters</b>                | <b>Avg.</b>      | <b>SD</b> | <b>n</b> | <b>Avg.</b> | <b>SD</b> | <b>n</b> | <b>Avg.</b>      | <b>SD</b> | <b>n</b> | <b>Avg.</b> | <b>SD</b> | <b>n</b> |
| <i>Bmp2 RNA</i>                  | 1.71             | 0.16      | 4        | 1.48        | 0.58      | 8        | 2.12             | 0.75      | 2        | 0.65        | 0.26      | 8        |
| pSMAD/Total SMAD                 | 1.20             | 0.17      | 4        | 1.43        | 0.34      | 3        | 1.10             | 0.33      | 3        | 0.87        | 0.74      | 3        |
| Calcium/Protein                  | 36.1             | 11.0      | 8        | 45.6        | 18.3      | 11       | 67.9             | 27.7      | 4        | 60.5        | 30.7      | 9        |
| Body Weight (g)                  | 22.9             | 2.6       | 15       | 22.7        | 3.5       | 23       | 18.9             | 2.4       | 12       | 18.2        | 1.6       | 24       |
| Heart Weight (g)                 | 0.115            | 0.014     | 11       | 0.114       | 0.021     | 15       | 0.099            | 0.023     | 8        | 0.098       | 0.019     | 19       |
| Heart / Body Weight              | 0.0051           | 0.0008    | 11       | 0.0052      | 0.0006    | 15       | 0.0052           | 0.0010    | 8        | 0.0054      | 0.0011    | 18       |
| Age (d) at euthanasia            | 47.7             | 4.4       | 15       | 47.3        | 5.5       | 23       | 47.5             | 5.6       | 12       | 48.7        | 5.4       | 25       |

610
